# Supplementary material
Source: PubMed Central journal article supplement (PMC10828950)
Supplement: jama-e2327693-s002.pdf [file jama-e2327693-s002.pdf]

## Supplemental Online Content

Colaizy TT, Poindexter BB, McDonald SA, et al; MILK Trial Investigators; Eunice Kennedy Shriver National Institute of Child Health and Human Development Neonatal Research Network. Neurodevelopmental outcomes of extremely preterm infants fed donor milk or preterm infant formula: a randomized clinical trial. Published online January 30, 2024. *JAMA*. doi:10.1001/jama.2023.27693

**eTable.** Neurodevelopmental Outcomes of Survivors Only

**eFigure.** Subgroup analyses of Bayley III Cognitive Score (primary outcome) by stratification variables

This supplemental material has been provided by the authors to give readers additional information about their work.

**eTable.** Neurodevelopmental Outcomes of Survivors Only

|                                                                        | n   | Donor Milk<br>N=210        | Preterm Formula<br>N=219   | Effect, 95% CI **<br>(donor milk vs. formula) |             |
|------------------------------------------------------------------------|-----|----------------------------|----------------------------|-----------------------------------------------|-------------|
| <b>Bayley-III Composite Scores<sup>†</sup>, mean (SD) median (IQR)</b> |     |                            |                            |                                               |             |
| <b>All survivors</b>                                                   |     |                            |                            | Adjusted Mean<br>Difference                   | 95% CI      |
| Cognitive                                                              | 369 | 85.1 (14.8)<br>85 (75, 95) | 84.7 (14.3)<br>85 (75,95)  | 0.12                                          | -2.80, 3.05 |
| Motor                                                                  | 361 | 86.4 (16.9)<br>88 (79, 94) | 84.8 (15.9)<br>88 (73, 97) | 0.95                                          | -2.46, 4.36 |
| Language                                                               | 361 | 81.8 (16.3)<br>86 (71, 91) | 79.8 (16.0)<br>79 (68, 91) | 1.81                                          | -1.45, 5.06 |
| <b>Sole diet cohort<br/>survivors</b>                                  |     |                            |                            | Adjusted Mean<br>Difference                   |             |
| Cognitive                                                              | 79  | 87.9 (12.4)<br>90 (85, 90) | 85.1 (15.8)<br>85 (75, 95) | 0.81                                          | -5.74, 7.36 |
| Motor                                                                  | 78  | 87.9 (14.8)<br>91 (82, 94) | 83.0 (16.6)<br>85 (73-94)  | 2.26                                          | -5.31, 9.84 |
| Language                                                               | 79  | 88.6 (14.7)<br>89 (86, 94) | 82.2 (16.6)<br>83 (71, 91) | 5.63                                          | -1.20, 12.5 |
| <b>Categorical Outcomes of all Survivors</b>                           |     |                            |                            |                                               |             |
| <b>Bayley-III &lt; 85</b>                                              |     |                            |                            | Adjusted RR                                   | 95% CI      |
| Cognitive                                                              | 369 | 66 (37%)                   | 81 (42%)                   | 0.90                                          | 0.71, 1.15  |
| Motor                                                                  | 361 | 61 (35%)                   | 77 (41%)                   | 0.90                                          | 0.70, 1.17  |
| Language                                                               | 361 | 86 (49%)                   | 109 (58%)                  | 0.84                                          | 0.70, 1.02  |
|                                                                        |     |                            |                            |                                               |             |
| <b>Bayley-III &lt; 70</b>                                              |     |                            |                            |                                               |             |
| Cognitive                                                              | 369 | 22 (12%)                   | 26 (14%)                   | 0.95§                                         | 0.72, 1.26  |
| Motor                                                                  | 361 | 20 (12%)                   | 33 (18%)                   | 0.68§                                         | 0.47, 0.99  |
| Language                                                               | 361 | 35 (20%)                   | 47 (25%)                   | 0.82                                          | 0.57, 1.19  |
| <b>NDI level</b>                                                       | 365 |                            |                            |                                               |             |
| No/mild                                                                | 179 | 88 (50%)                   | 91 (48%)                   |                                               |             |
| Moderate                                                               | 114 | 58 (33%)                   | 56 (30%)                   |                                               |             |
| Severe                                                                 | 72  | 30 (17%)                   | 42 (22%)                   |                                               |             |
| Moderate/severe NDI                                                    | 366 | 89 (50%)                   | 98 (52%)                   | 0.99                                          | 0.82, 1.20  |

**eFigure.** Subgroup analyses Bayley III Cognitive score by stratification and other key variables

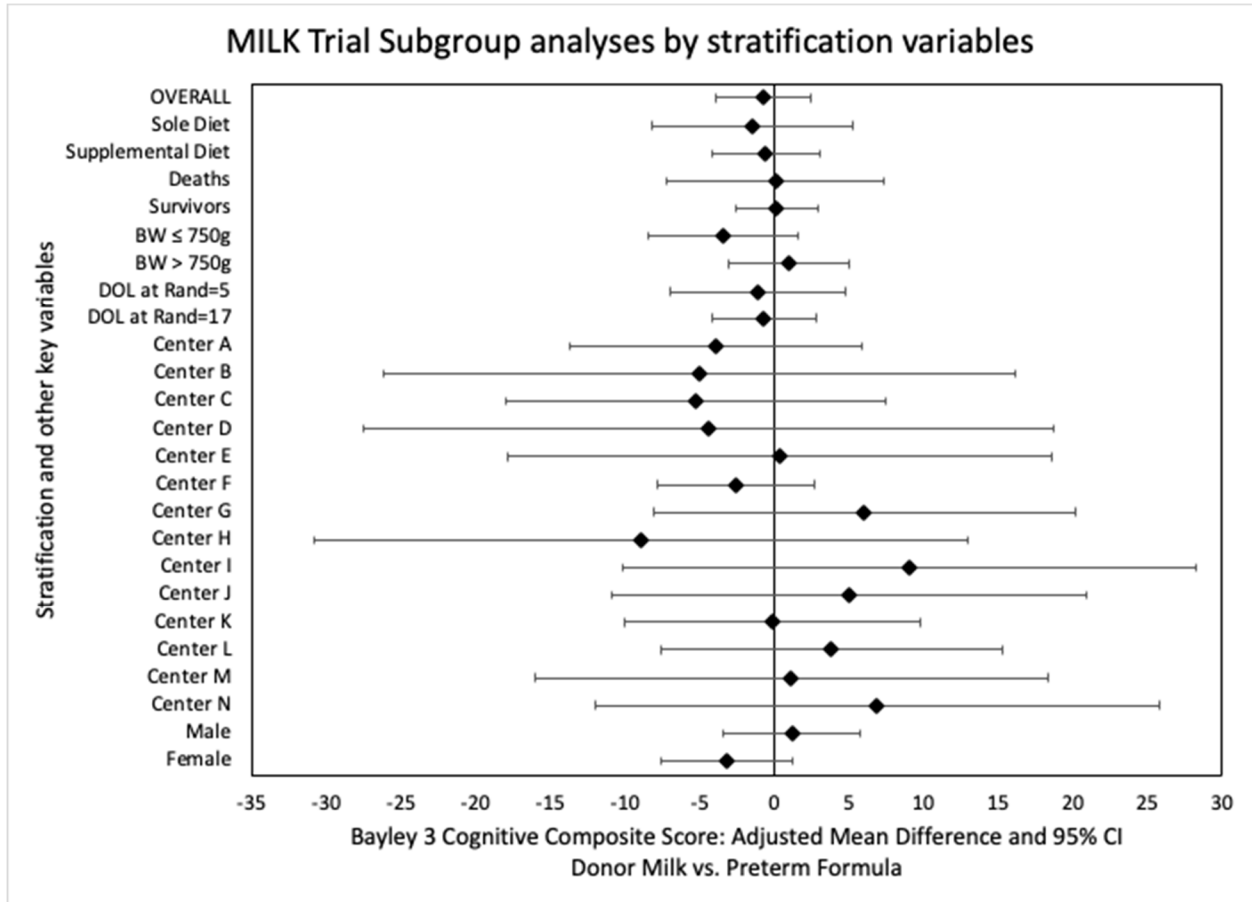

- Sole Diet = no maternal milk intake
- Supplemental Diet = minimal maternal milk intake
- Day of life at randomization = 5 (DOL at Rand=5) = Infants randomized on day of life 5, the median day of randomization for all infants randomized prior to their first feeding.
- Day of life at randomization = 17 (DOL at Rand=17) = Infants randomized on day of life 17, the median day of randomization for all infants randomized after their first feeding.
