# Supplementary material
Source: PubMed Central journal article supplement (PMC10828950)
Supplement: jama-e2327693-s003.pdf [file jama-e2327693-s003.pdf]

Supplemental Online Content: Nonauthor Collaborators

\*First name, last name, and suffix (if applicable) are required and will appear in PubMed.

**\*Group Name(s): Eunice Kennedy Shriver National Institute of Child Health and Human Development Neonatal Research Network**

| <b>*First Name and Middle Initial(s)</b> | <b>*Last Name</b> | <b>*Suffix (eg, Jr, III)</b> | Academic Degrees | Institution                                                                      | Location (city, state/province, country) | Role or Contribution, eg, chair, principal investigator |
|------------------------------------------|-------------------|------------------------------|------------------|----------------------------------------------------------------------------------|------------------------------------------|---------------------------------------------------------|
| Richard A                                | Polin             |                              | MD               | Division of Neonatology, College of Physicians and Surgeons, Columbia University | New York, NY, USA                        | Steering Committee Chair                                |
| Martin                                   | Keszler           |                              | MD               | Department of Pediatrics, Women & Infants' Hospital, Brown University            | Providence, RI, USA                      | Co-Principal Investigator                               |
| Angelita M                               | Hensman           |                              | PhD, RNC-NIC     | Department of Pediatrics, Women & Infants' Hospital, Brown University            | Providence, RI, USA                      | Research Coordinator                                    |
| Elisa                                    | Viera             |                              | RN, BSN          | Department of Pediatrics, Women & Infants' Hospital, Brown University            | Providence, RI, USA                      | Research Coordinator                                    |
| Lucille                                  | St. Pierre        |                              | BS               | Department of Pediatrics, Women & Infants' Hospital, Brown University            | Providence, RI, USA                      | Follow-up Examiner                                      |
| Robert T                                 | Burke             |                              | MD, MPH          | Department of Pediatrics, Women & Infants' Hospital, Brown University            | Providence, RI, USA                      | Follow-up Examiner                                      |
| Barbara                                  | Alksninis         |                              | RNC PNP          | Department of Pediatrics, Women & Infants' Hospital, Brown University            | Providence, RI, USA                      | Follow-up Examiner                                      |
| Andrea                                   | Knoll             |                              |                  | Department of Pediatrics, Women & Infants' Hospital, Brown University            | Providence, RI, USA                      | Follow-up Coordinator                                   |
| Mary L                                   | Keszler           |                              | MD               | Department of Pediatrics, Women & Infants' Hospital, Brown University            | Providence, RI, USA                      | Follow-up Examiner                                      |
| Teresa M                                 | Leach             |                              | Med CAES         | Department of Pediatrics, Women & Infants' Hospital, Brown University            | Providence, RI, USA                      | Follow-up Examiner                                      |
| Elisabeth C                              | McGowan           |                              | MD               | Department of Pediatrics, Women & Infants' Hospital, Brown University            | Providence, RI, USA                      | Follow-up Examiner                                      |
| Victoria E                               | Watson            |                              | MS CAS           | Department of Pediatrics, Women & Infants' Hospital, Brown University            | Providence, RI, USA                      | Follow-up Examiner                                      |
| Nancy S                                  | Newman            |                              | RN               | Case Western Reserve University; Rainbow Babies & Childrens' Hospital            | Cleveland, OH, USA                       | Research Coordinator                                    |
| Bonny S                                  | Siner             |                              | RN               | Case Western Reserve University; Rainbow Babies & Childrens' Hospital            | Cleveland, OH, USA                       | Follow-up Coordinator                                   |

Supplemental Online Content: Nonauthor Collaborators

\*First name, last name, and suffix (if applicable) are required and will appear in PubMed.

|            |           |  |                           |                                                                                       |                      |                                     |
|------------|-----------|--|---------------------------|---------------------------------------------------------------------------------------|----------------------|-------------------------------------|
| Angelia    | Williams  |  |                           | Case Western Reserve University;<br>Rainbow Babies & Childrens'<br>Hospital           | Cleveland, OH, USA   | Research Coordinator                |
| Elizabeth  | Roth      |  | PhD                       | Case Western Reserve University;<br>Rainbow Babies & Childrens'<br>Hospital           | Cleveland, OH, USA   | Follow-up Examiner                  |
| William E  | Truog     |  | MD                        | Childrens' Mercy Hospital                                                             | Kansas City, MO, USA | Principal Investigator              |
| Eugenia K  | Palotto   |  | MD,<br>MSCE               | Childrens' Mercy Hospital                                                             | Kansas City, MO, USA |                                     |
| Cheri      | Gauldin   |  | RN BS<br>CCRC             | Childrens' Mercy Hospital                                                             | Kansas City, MO, USA | Research Coordinator                |
| Anne       | Holmes    |  | RN MSN<br>MBA-HCM<br>CCRC | Childrens' Mercy Hospital                                                             | Kansas City, MO, USA | Research Nurse                      |
| Kathy      | Johnson   |  | RN CCRC                   | Childrens' Mercy Hospital                                                             | Kansas City, MO, USA | Research Nurse                      |
| Allison    | Scott     |  | BSN RNC-<br>NIC           | Childrens' Mercy Hospital                                                             | Kansas City, MO, USA | Research Coordinator                |
| Lisa       | Gaetano   |  | RN MSN                    | Childrens' Mercy Hospital                                                             | Kansas City, MO, USA | Research Coordinator                |
| C Michael  | Cotten    |  | MD MHS                    | Duke University School of Medicine,<br>University Hospital; Duke Regional<br>Hospital | Durham, NC USA       |                                     |
| Ronald N   | Goldberg  |  | MD                        | Duke University School of Medicine,<br>University Hospital; Duke Regional<br>Hospital | Durham, NC USA       | Principal Investigator              |
| Ricki F    | Goldstein |  | MD                        | Duke University School of Medicine,<br>University Hospital; Duke Regional<br>Hospital | Durham, NC USA       | Follow-Up Principal<br>Investigator |
| Patricia L | Ashley    |  | MD                        | Duke University School of Medicine,<br>University Hospital; Duke Regional<br>Hospital | Durham, NC USA       | Follow-up Examiner                  |
| Deena      | Mago-Shah |  | MD                        | Duke University School of Medicine,<br>University Hospital; Duke Regional<br>Hospital | Durham, NC USA       | Follow-up Examiner                  |
| Joanne     | Finkle    |  | RN JD                     | Duke University School of Medicine,<br>University Hospital; Duke Regional<br>Hospital | Durham, NC USA       | Research Coordinator                |
| Kathryn E  | Gustafson |  | PhD                       | Duke University School of Medicine,<br>University Hospital; Duke Regional<br>Hospital | Durham, NC USA       | Follow-up Examiner                  |

## Supplemental Online Content: Nonauthor Collaborators

\*First name, last name, and suffix (if applicable) are required and will appear in PubMed.

|           |                  |  |               |                                                                                 |                 |                                  |
|-----------|------------------|--|---------------|---------------------------------------------------------------------------------|-----------------|----------------------------------|
| Carl L    | Bose             |  | MD            | Duke University School of Medicine, University Hospital; Duke Regional Hospital | Durham, NC USA  | Site Investigator                |
| Janice    | Bernhardt        |  | MS RN         | Duke University School of Medicine, University Hospital; Duke Regional Hospital | Durham, NC USA  | Research Coordinator             |
| Gennie    | Bose             |  | RN            | Duke University School of Medicine, University Hospital; Duke Regional Hospital | Durham, NC USA  | Research Coordinator             |
| Janice    | Wereszczak       |  | CPNP-AC/PC    | Duke University School of Medicine, University Hospital; Duke Regional Hospital | Durham, NC USA  | Follow-up Examiner               |
| Diane     | Warner           |  | MD MPH        | Duke University School of Medicine, University Hospital; Duke Regional Hospital | Durham, NC USA  | Follow-Up Principal Investigator |
| Jennifer  | Talbert          |  | MS RN         | Duke University School of Medicine, University Hospital; Duke Regional Hospital | Durham, NC USA  | Research Coordinator             |
| Ravi      | Patel            |  | MD MSC        | Emory University School of Medicine and Children's Healthcare of Atlanta        | Atlanta, GA USA | Principal Investigator           |
| David P   | Carlton          |  | MD            | Emory University School of Medicine and Children's Healthcare of Atlanta        | Atlanta, GA USA | Investigator                     |
| Barbara J | Stoll            |  | MD            | Emory University School of Medicine and Children's Healthcare of Atlanta        | Atlanta, GA USA | Investigator                     |
| Yvonne    | Loggins          |  | RN            | Emory University School of Medicine and Children's Healthcare of Atlanta        | Atlanta, GA USA | Research Coordinator             |
| Diane     | Bottcher         |  | RN            | Emory University School of Medicine and Children's Healthcare of Atlanta        | Atlanta, GA USA | Research Nurse                   |
| Sheena L  | Carter           |  | PhD           | Emory University School of Medicine and Children's Healthcare of Atlanta        | Atlanta, GA USA | Follow-up Examiner               |
| Ellen C   | Hale             |  | BS RN<br>CCRC | Emory University School of Medicine and Children's Healthcare of Atlanta        | Atlanta, GA USA | Research Coordinator             |
| Salathiel | Kendrick-Allwood |  | MD            | Emory University School of Medicine and Children's Healthcare of Atlanta        | Atlanta, GA USA | Follow-up Examiner               |
| Judith    | Laursen          |  | RN            | Emory University School of Medicine and Children's Healthcare of Atlanta        | Atlanta, GA USA | Follow-up Examiner               |
| Maureen   | Mulligan LaRossa |  | RN            | Emory University School of Medicine and Children's Healthcare of Atlanta        | Atlanta, GA USA | Follow-up Examiner               |
| Colleen   | Mackie           |  | RRT           | Emory University School of Medicine and Children's Healthcare of Atlanta        | Atlanta, GA USA | Research Nurse                   |
| Amy       | Sanders          |  | PsyD          | Emory University School of Medicine and Children's Healthcare of Atlanta        | Atlanta, GA USA | Follow-up Examiner               |

Supplemental Online Content: Nonauthor Collaborators

\*First name, last name, and suffix (if applicable) are required and will appear in PubMed.

|             |               |  |                 |                                                                                                                |                      |                                  |
|-------------|---------------|--|-----------------|----------------------------------------------------------------------------------------------------------------|----------------------|----------------------------------|
| Gloria      | Smile         |  | PNP             | Emory University School of Medicine and Children's Healthcare of Atlanta                                       | Atlanta, GA USA      | Follow-up Examiner               |
| Lynn        | Wineski       |  | NNP             | Emory University School of Medicine and Children's Healthcare of Atlanta                                       | Atlanta, GA USA      | Follow-up Examiner               |
| Andrew A    | Bremer        |  | MD PhD          | Eunice Kennedy Shriver National Institute of Child Health and Human Development, National Institutes of Health | Bethesda, MD USA     | Program Officer                  |
| Stephanie   | Wilson Archer |  | MA              | Eunice Kennedy Shriver National Institute of Child Health and Human Development, National Institutes of Health | Bethesda, MD USA     | Clinical Trials Specialist       |
| Lu Ann      | Papile        |  | MD              | Indiana University School of Medicine                                                                          | Indianapolis, IN USA | Follow-Up Principal Investigator |
| Carolyn     | Lytle         |  | MD MPH          | Indiana University School of                                                                                   | Indianapolis, IN USA | Follow-up Examiner               |
| Lucy        | Smiley        |  | CCRC            | Indiana University School of                                                                                   | Indianapolis, IN USA | Research Nurse                   |
| Leslie Dawn | Wilson        |  | BSN<br>CCRC     | Indiana University School of Medicine                                                                          | Indianapolis, IN USA |                                  |
| Donna       | Watkins       |  | MSN NNP-<br>BC  | Indiana University School of Medicine                                                                          | Indianapolis, IN USA |                                  |
| Susan       | Gunn          |  | NNP-BC<br>CCRC  | Indiana University School of Medicine                                                                          | Indianapolis, IN USA |                                  |
| Jeff        | Joyce         |  | CCRC            | Indiana University School of                                                                                   | Indianapolis, IN USA |                                  |
| Jon E       | Tyson         |  | MD MPH          | McGovern Medical School at The University of Texas Health Science Center at Houston                            | Houston, TX USA      | Principal Investigator           |
| Amir M      | Khan          |  | MD              | McGovern Medical School at The University of Texas Health Science Center at Houston                            | Houston, TX USA      | Principal Investigator           |
| Barbara J   | Stoll         |  | MD              | McGovern Medical School at The University of Texas Health Science Center at Houston                            | Houston, TX USA      |                                  |
| Ricardo A   | Mosquera      |  | MD MS           | McGovern Medical School at The University of Texas Health Science Center at Houston                            | Houston, TX USA      | Follow-Up Principal Investigator |
| Emily       | Stephens      |  | BSN RNC-<br>NIC | McGovern Medical School at The University of Texas Health Science Center at Houston                            | Houston, TX USA      | Research Coordinator             |
| Elizabeth   | Allain        |  | PhD             | McGovern Medical School at The University of Texas Health Science Center at Houston                            | Houston, TX USA      | Research Nurse                   |

Supplemental Online Content: Nonauthor Collaborators

\*First name, last name, and suffix (if applicable) are required and will appear in PubMed.

|           |                 |  |         |                                                                                     |                 |                       |
|-----------|-----------------|--|---------|-------------------------------------------------------------------------------------|-----------------|-----------------------|
| Julie     | ArlDt-McAlister |  | RN BSN  | McGovern Medical School at The University of Texas Health Science Center at Houston | Houston, TX USA |                       |
| Fatima    | Boricha         |  | MD      | McGovern Medical School at The University of Texas Health Science Center at Houston | Houston, TX USA | Follow-up Examiner    |
| Katrina   | Burson          |  | RN BSN  | McGovern Medical School at The University of Texas Health Science Center at Houston | Houston, TX USA |                       |
| Allison G | Dempsey         |  | PhD     | McGovern Medical School at The University of Texas Health Science Center at Houston | Houston, TX USA | Follow-up Examiner    |
| Carmen    | Garcia          |  | RN CCRP | McGovern Medical School at The University of Texas Health Science Center at Houston | Houston, TX USA | Research Nurse        |
| Donna J   | Hall            |  | RN      | McGovern Medical School at The University of Texas Health Science Center at Houston | Houston, TX USA | Follow-up Examiner    |
| Janice    | John            |  | CPNP    | McGovern Medical School at The University of Texas Health Science Center at Houston | Houston, TX USA | Follow-up Examiner    |
| Patrick M | Jones           |  | MD MA   | McGovern Medical School at The University of Texas Health Science Center at Houston | Houston, TX USA |                       |
| M Layne   | Lillie          |  | RN BSN  | McGovern Medical School at The University of Texas Health Science Center at Houston | Houston, TX USA | Follow-up Coordinator |
| Karen     | Martin          |  | RN      | McGovern Medical School at The University of Texas Health Science Center at Houston | Houston, TX USA | Research Nurse        |
| Sara C    | Martin          |  | RN BSN  | McGovern Medical School at The University of Texas Health Science Center at Houston | Houston, TX USA |                       |
| Carrie M  | Mason           |  | MA LPA  | McGovern Medical School at The University of Texas Health Science Center at Houston | Houston, TX USA |                       |
| Georgia E | McDavid         |  | RN      | McGovern Medical School at The University of Texas Health Science Center at Houston | Houston, TX USA | Research Coordinator  |
| Shannon L | McKee           |  | EdS     | McGovern Medical School at The University of Texas Health Science Center at Houston | Houston, TX USA | Follow-up Examiner    |

Supplemental Online Content: Nonauthor Collaborators

\*First name, last name, and suffix (if applicable) are required and will appear in PubMed.

|             |              |  |         |                                                                                     |                  |                                  |
|-------------|--------------|--|---------|-------------------------------------------------------------------------------------|------------------|----------------------------------|
| Michelle    | Poe          |  | PhD RN  | McGovern Medical School at The University of Texas Health Science Center at Houston | Houston, TX USA  | Follow-up Examiner               |
| Kimberly    | Rennie       |  | PhD     | McGovern Medical School at The University of Texas Health Science Center at Houston | Houston, TX USA  | Follow-up Examiner               |
| Tina        | Reddy        |  | MD      | McGovern Medical School at The University of Texas Health Science Center at Houston | Houston, TX USA  | Follow-up Examiner               |
| Shawna      | Rodgers      |  | RN BSN  | McGovern Medical School at The University of Texas Health Science Center at Houston | Houston, TX USA  | Research Nurse                   |
| Saba        | Khan Siddiki |  | MD      | McGovern Medical School at The University of Texas Health Science Center at Houston | Houston, TX USA  |                                  |
| Daniel      | Sperry       |  | RN      | McGovern Medical School at The University of Texas Health Science Center at Houston | Houston, TX USA  | Research Nurse                   |
| Patti L     | Pierce Tate  |  | RCP     | McGovern Medical School at The University of Texas Health Science Center at Houston | Houston, TX USA  |                                  |
| Sharon L    | Wright       |  | MT ASCP | McGovern Medical School at The University of Texas Health Science Center at Houston | Houston, TX USA  | Follow-up Examiner               |
| Jonathan L  | Slaughter    |  | MD MPH  | Nationwide Children's Hospital, The Ohio State University College of Medicine       | Columbus, OH USA | Site Investigator                |
| Christopher | Timan        |  | MD      | Nationwide Children's Hospital, The Ohio State University College of Medicine       | Columbus, OH USA | Follow-up Examiner               |
| Keith O     | Yeates       |  | MD PhD  | Nationwide Children's Hospital, The Ohio State University College of Medicine       | Columbus, OH USA | Follow-Up Principal Investigator |
| Patricia    | Luzader      |  | RN      | Nationwide Children's Hospital, The Ohio State University College of Medicine       | Columbus, OH USA | Research Coordinator             |
| Nancy       | Batterson    |  | OT/L    | Nationwide Children's Hospital, The Ohio State University College of Medicine       | Columbus, OH USA | Follow-up Examiner               |
| Hallie      | Baughner     |  | BS MSN  | Nationwide Children's Hospital, The Ohio State University College of Medicine       | Columbus, OH USA | Research Nurse                   |

Supplemental Online Content: Nonauthor Collaborators

\*First name, last name, and suffix (if applicable) are required and will appear in PubMed.

|             |           |  |           |                                                                               |                  |                      |
|-------------|-----------|--|-----------|-------------------------------------------------------------------------------|------------------|----------------------|
| Demi R      | Beckford  |  | MHS       | Nationwide Children's Hospital, The Ohio State University College of Medicine | Columbus, OH USA | Follow-up Examiner   |
| Stephanie   | Burkhardt |  | BS MPH    | Nationwide Children's Hospital, The Ohio State University College of Medicine | Columbus, OH USA | Follow-up Examiner   |
| Helen       | Carey     |  | PT DHSc   | Nationwide Children's Hospital, The Ohio State University College of Medicine | Columbus, OH USA | Follow-up Examiner   |
| Michelle    | Chao      |  | BS        | Nationwide Children's Hospital, The Ohio State University College of Medicine | Columbus, OH USA | Research Coordinator |
| Courtney    | Cira      |  | BS        | Nationwide Children's Hospital, The Ohio State University College of Medicine | Columbus, OH USA | Research Coordinator |
| Erna        | Clark     |  | BA        | Nationwide Children's Hospital, The Ohio State University College of Medicine | Columbus, OH USA | Research Coordinator |
| Brittany    | DeSantis  |  | BS        | Nationwide Children's Hospital, The Ohio State University College of Medicine | Columbus, OH USA | Research Coordinator |
| Erin        | Fearn     |  |           | Nationwide Children's Hospital, The Ohio State University College of Medicine | Columbus, OH USA | Research Coordinator |
| Christine A | Fortney   |  | RN PhD    | Nationwide Children's Hospital, The Ohio State University College of Medicine | Columbus, OH USA | Research Coordinator |
| Aubrey      | Fowler    |  | BS        | Nationwide Children's Hospital, The Ohio State University College of Medicine | Columbus, OH USA | Research Coordinator |
| Juie        | Gutentag  |  | RN BSN    | Nationwide Children's Hospital, The Ohio State University College of Medicine | Columbus, OH USA | Research Nurse       |
| Jennifer L  | Grothouse |  | BS RN BSN | Nationwide Children's Hospital, The Ohio State University College of Medicine | Columbus, OH USA | Research Nurse       |
| Cole D      | Hague     |  | BA MS     | Nationwide Children's Hospital, The Ohio State University College of Medicine | Columbus, OH USA | Follow-up Examiner   |
| Sarah A     | Keim      |  | PhD MA MS | Nationwide Children's Hospital, The Ohio State University College of Medicine | Columbus, OH USA | Follow-up Examiner   |

## Supplemental Online Content: Nonauthor Collaborators

\*First name, last name, and suffix (if applicable) are required and will appear in PubMed.

|            |               |  |         |                                                                               |                  |                       |
|------------|---------------|--|---------|-------------------------------------------------------------------------------|------------------|-----------------------|
| Katelyn    | Levengood     |  | PT DPT  | Nationwide Children's Hospital, The Ohio State University College of Medicine | Columbus, OH USA | Follow-up Examiner    |
| Laura      | Marzec        |  | MD      | Nationwide Children's Hospital, The Ohio State University College of Medicine | Columbus, OH USA | Follow-up Examiner    |
| Jacqueline | McCool        |  |         | Nationwide Children's Hospital, The Ohio State University College of Medicine | Columbus, OH USA | Research Coordinator  |
| Bethany    | Miller        |  | RN BSN  | Nationwide Children's Hospital, The Ohio State University College of Medicine | Columbus, OH USA | Research Nurse        |
| Pamela     | Morehead      |  | BS MS   | Nationwide Children's Hospital, The Ohio State University College of Medicine | Columbus, OH USA |                       |
| Mary Ann   | Nelin         |  | MD      | Nationwide Children's Hospital, The Ohio State University College of Medicine | Columbus, OH USA |                       |
| Julia      | Newton        |  | MPH     | Nationwide Children's Hospital, The Ohio State University College of Medicine | Columbus, OH USA | Research Coordinator  |
| Courtney   | Park          |  | RN BSN  | Nationwide Children's Hospital, The Ohio State University College of Medicine | Columbus, OH USA | Research Nurse        |
| Lindsay    | Pietruszewski |  | PT DPT  | Nationwide Children's Hospital, The Ohio State University College of Medicine | Columbus, OH USA | Research Coordinator  |
| Jessica    | Purnell       |  | BS CCRC | Nationwide Children's Hospital, The Ohio State University College of Medicine | Columbus, OH USA | Research Coordinator  |
| Julie C    | Shadd         |  | BSN RD  | Nationwide Children's Hospital, The Ohio State University College of Medicine | Columbus, OH USA | Research Coordinator  |
| Kristi L   | Small         |  | BS      | Nationwide Children's Hospital, The Ohio State University College of Medicine | Columbus, OH USA | Follow-up Coordinator |
| Melanie    | Stein         |  | RRT BBS | Nationwide Children's Hospital, The Ohio State University College of Medicine | Columbus, OH USA | Follow-up Examiner    |
| Margaret   | Sullivan      |  | BS      | Nationwide Children's Hospital, The Ohio State University College of Medicine | Columbus, OH USA | Follow-up Examiner    |



## Supplemental Online Content: Nonauthor Collaborators

\*First name, last name, and suffix (if applicable) are required and will appear in PubMed.

|             |                 |  |                |                                                                               |                                |                        |
|-------------|-----------------|--|----------------|-------------------------------------------------------------------------------|--------------------------------|------------------------|
| Rox Ann     | Sullivan        |  | RN BSN         | Nationwide Children's Hospital, The Ohio State University College of Medicine | Columbus, OH USA               | Follow-up Examiner     |
| Kyrstin     | Warnimont       |  | BS             | Nationwide Children's Hospital, The Ohio State University College of Medicine | Columbus, OH USA               | Research Coordinator   |
| Lina        | Yossef-Salameh  |  | MD             | Nationwide Children's Hospital, The Ohio State University College of Medicine | Columbus, OH USA               | Site Investigator      |
| Carla M     | Bann            |  | PhD            | Social, Statistical, and Environmental Sciences Unit, RTI                     | Research Triangle Park, NC USA | Statistician           |
| Marie G     | Gantz           |  | PhD            | Social, Statistical, and Environmental Sciences Unit, RTI                     | Research Triangle Park, NC USA | Statistician           |
| Dennis      | Wallace         |  | PhD            | Social, Statistical, and Environmental Sciences Unit, RTI                     | Research Triangle Park, NC USA | Principal Investigator |
| Jeanette    | O'Donnell Auman |  | BS             | Social, Statistical, and Environmental Sciences Unit, RTI                     | Research Triangle Park, NC USA | Database Programmer    |
| Annie       | Bayard          |  | BS             | Social, Statistical, and Environmental Sciences Unit, RTI                     | Research Triangle Park, NC USA |                        |
| Jenna       | Gabrio          |  | BS MPH         | Social, Statistical, and Environmental Sciences Unit, RTI                     | Research Triangle Park, NC USA | Program Coordinator    |
| David       | Leblond         |  | BS             | Social, Statistical, and Environmental Sciences Unit, RTI                     | Research Triangle Park, NC USA |                        |
| Jamie E     | Newman          |  | PhD MPH        | Social, Statistical, and Environmental Sciences Unit, RTI                     | Research Triangle Park, NC USA | Follow-up Coordinator  |
| Lindsay     | Parlberg        |  | BS             | Social, Statistical, and Environmental Sciences Unit, RTI                     | Research Triangle Park, NC USA | Research Coordinator   |
| Carolyn M   | Petrie Huitema  |  | MS             | Social, Statistical, and Environmental Sciences Unit, RTI                     | Research Triangle Park, NC USA | Research Coordinator   |
| Kristin M   | Zaterka-Baxter  |  | RN BSN         | Social, Statistical, and Environmental Sciences Unit, RTI                     | Research Triangle Park, NC USA | Research Coordinator   |
| Monica V    | Collins         |  | RN BSN<br>MaEd | University of Alabama at Birmingham Health System                             | Birmingham, AL USA             | Research Coordinator   |
| Shirley S   | Cosby           |  | RN BSN         | University of Alabama at Birmingham Health System                             | Birmingham, AL USA             | Research Coordinator   |
| Kirstin J   | Bailey          |  | PhD            | University of Alabama at Birmingham Health System                             | Birmingham, AL USA             | Follow-up Examiner     |
| Fred J      | Biasini         |  | PhD            | University of Alabama at Birmingham Health System                             | Birmingham, AL USA             | Follow-up Examiner     |
| Stephanie A | Chopko          |  | PhD            | University of Alabama at Birmingham Health System                             | Birmingham, AL USA             | Follow-up Examiner     |

## Supplemental Online Content: Nonauthor Collaborators

\*First name, last name, and suffix (if applicable) are required and will appear in PubMed.

|            |              |  |                    |                                                          |                     |                                  |
|------------|--------------|--|--------------------|----------------------------------------------------------|---------------------|----------------------------------|
| Kristy A   | Domnanovich  |  | PhD                | University of Alabama at Birmingham Health System        | Birmingham, AL USA  | Follow-up Examiner               |
| Chantel J  | Jno-Finn     |  | PT DPT             | University of Alabama at Birmingham Health System        | Birmingham, AL USA  | Follow-up Examiner               |
| Morissa    | Ladinsky     |  | MD                 | University of Alabama at Birmingham Health System        | Birmingham, AL USA  | Follow-up Examiner               |
| Mary Beth  | Moses        |  | PT MS<br>PCS       | University of Alabama at Birmingham Health System        | Birmingham, AL USA  | Follow-up Examiner               |
| Tara E     | McNair       |  | RN BSN             | University of Alabama at Birmingham Health System        | Birmingham, AL USA  | Research Nurse                   |
| Vivien A   | Phillips     |  | RN BSN             | University of Alabama at Birmingham Health System        | Birmingham, AL USA  | Follow-up Coordinator            |
| Julie      | Preskitt     |  | MSOT<br>MPH        | University of Alabama at Birmingham Health System        | Birmingham, AL USA  | Follow-up Examiner               |
| Richard V  | Rector       |  | PhD                | University of Alabama at Birmingham Health System        | Birmingham, AL USA  | Follow-up Examiner               |
| Kimberly   | Stringer     |  | MD MPH             | University of Alabama at Birmingham Health System        | Birmingham, AL USA  | Follow-up Examiner               |
| Sally      | Whitley      |  | MA OTR-L<br>FAOTA  | University of Alabama at Birmingham Health System        | Birmingham, AL USA  | Follow-up Examiner               |
| Sheree     | York Chapman |  | PT DPT<br>PCS      | University of Alabama at Birmingham Health System        | Birmingham, AL USA  | Follow-up Examiner               |
| John       | Widness      |  | MD                 | University of Iowa                                       | Iowa City, IA USA   | Investigator                     |
| Jane E     | Brumbaugh    |  | MD                 | University of Iowa                                       | Iowa City, IA USA   | Follow-Up Principal Investigator |
| Mendi L    | Schmelzel    |  | RN MSN             | University of Iowa                                       | Iowa City, IA USA   | Research Nurse                   |
| Jacky R    | Walker       |  | RN                 | University of Iowa                                       | Iowa City, IA USA   | Research Nurse                   |
| Claire A   | Goeke        |  | RN                 | University of Iowa                                       | Iowa City, IA USA   | Research Nurse                   |
| Diane L    | Eastman      |  | RN CPNP<br>MA      | University of Iowa                                       | Iowa City, IA USA   | Follow-up Coordinator            |
| Michelle L | Baack        |  | MD                 | Sanford School of Medicine<br>University of South Dakota | Sioux Falls, SD USA | Site Investigator                |
| Megan M    | Henning      |  | RN BSN             | Sanford School of Medicine<br>University of South Dakota | Sioux Falls, SD USA | Research Nurse                   |
| Chelsey    | Elenkiwich   |  | NNP<br>APRN<br>CNP | Sanford School of Medicine<br>University of South Dakota | Sioux Falls, SD USA | Research Nurse                   |
| Megan      | Broadbent    |  | RN BSN             | Sanford School of Medicine<br>University of South Dakota | Sioux Falls, SD USA | Research Nurse                   |
| Sarah      | Van Muyden   |  | RN BSN             | Sanford School of Medicine<br>University of South Dakota | Sioux Falls, SD USA |                                  |

## Supplemental Online Content: Nonauthor Collaborators

\*First name, last name, and suffix (if applicable) are required and will appear in PubMed.

|           |                  |  |                        |                                                                  |                      |                                  |
|-----------|------------------|--|------------------------|------------------------------------------------------------------|----------------------|----------------------------------|
| Kristi L  | Watterberg       |  | MD                     | University of New Mexico Health Sciences Center                  | Albuquerque, NM USA  | Principal Investigator           |
| Conra     | Backstrom Lacy   |  | RN                     | University of New Mexico Health Sciences Center                  | Albuquerque, NM USA  | Research Coordinator             |
| Carol     | Hartenberger     |  | BSN MPH                | University of New Mexico Health Sciences Center                  | Albuquerque, NM USA  | Research Nurse                   |
| Sandra    | Sundquist Beaman |  | MSN RNC                | University of New Mexico Health Sciences Center                  | Albuquerque, NM USA  | Research Nurse                   |
| Mary      | Hanson           |  | RN BSN                 | University of New Mexico Health Sciences Center                  | Albuquerque, NM USA  | Research Nurse                   |
| Jean R    | Lowe             |  | PhD                    | University of New Mexico Health Sciences Center                  | Albuquerque, NM USA  | Follow-up Examiner               |
| Elizabeth | Kuan             |  | RN BSN                 | University of New Mexico Health Sciences Center                  | Albuquerque, NM USA  | Research Nurse                   |
| Eric C    | Eichenwald       |  | MD                     | University of Pennsylvania Perelman School of Medicine           | Philadelphia, PA USA | Principal Investigator           |
| Haresh    | Kirpalani        |  | MB MSc                 | University of Pennsylvania Perelman School of Medicine           | Philadelphia, PA USA | Principal Investigator           |
| Aasma S   | Chaudhary        |  | BS RRT                 | University of Pennsylvania Perelman School of Medicine           | Philadelphia, PA USA | Research Coordinator             |
| Toni      | Mancini          |  | RN BSN<br>CCRC         | University of Pennsylvania Perelman School of Medicine           | Philadelphia, PA USA | Research Coordinator             |
| Judy C    | Berenbaum        |  | MD                     | University of Pennsylvania Perelman School of Medicine           | Philadelphia, PA USA | Follow-up Examiner               |
| Marsha    | Gerdes           |  | PhD                    | University of Pennsylvania Perelman School of Medicine           | Philadelphia, PA USA | Follow-up Examiner               |
| Hallam    | Hurt             |  | MD                     | University of Pennsylvania Perelman School of Medicine           | Philadelphia, PA USA | Follow-up Examiner               |
| Jonathan  | Snyder           |  | RN BSN                 | University of Pennsylvania Perelman School of Medicine           | Philadelphia, PA USA | Research Nurse                   |
| Saritha   | Vangala          |  | RN MSN                 | University of Pennsylvania Perelman School of Medicine           | Philadelphia, PA USA |                                  |
| Kristina  | Ziolkowski       |  | CMA<br>(AAMA )<br>CCRP | University of Pennsylvania Perelman School of Medicine           | Philadelphia, PA USA | Research Coordinator             |
| Ronnie    | Guillet          |  | MD PhD                 | University of Rochester School of Medicine and Dentistry         | Rochester, NY USA    | Principal Investigator           |
| Gary J    | Myers            |  | MD                     | University of Rochester School of Medicine and Dentistry         | Rochester, NY USA    | Follow-Up Principal Investigator |
| Satyan    | Lakshminrusimha  |  | MD                     | University of Buffalo Women's and Children's Hospital of Buffalo | Buffalo, NY USA      | Principal Investigator           |

## Supplemental Online Content: Nonauthor Collaborators

\*First name, last name, and suffix (if applicable) are required and will appear in PubMed.

|            |            |  |                     |                                                                  |                   |                       |
|------------|------------|--|---------------------|------------------------------------------------------------------|-------------------|-----------------------|
| Holly I M  | Wadkins    |  |                     | University of Rochester School of Medicine and Dentistry         | Rochester, NY USA | Research Coordinator  |
| Michael G  | Sacilowski |  | BS                  | University of Buffalo Women's and Children's Hospital of Buffalo | Buffalo, NY USA   | Follow-up Coordinator |
| Melissa F  | Carmen     |  | MD                  |                                                                  |                   |                       |
| Rosemary L | Jensen     |  |                     | University of Rochester School of Medicine and Dentistry         | Rochester, NY USA | Follow-up Coordinator |
| Joan       | Merzbach   |  | LMSW                | University of Rochester School of Medicine and Dentistry         | Rochester, NY USA | Follow-up Examiner    |
| William    | Zorn       |  | PhD                 | University of Buffalo Women's and Children's Hospital of Buffalo | Buffalo, NY USA   | Follow-up Examiner    |
| Osman      | Farooq     |  | MD                  | University of Rochester School of Medicine and Dentistry         | Rochester, NY USA | Site Investigator     |
| Ashley     | Williams   |  | MSEd                | University of Buffalo Women's and Children's Hospital of Buffalo | Buffalo, NY USA   | Research Coordinator  |
| Stephanie  | Guilford   |  | BS                  | University of Buffalo Women's and Children's Hospital of Buffalo | Buffalo, NY USA   | Research Coordinator  |
| Kelley     | Yost       |  | PhD                 | University of Rochester School of Medicine and Dentistry         | Rochester, NY USA | Follow-up Examiner    |
| Melissa    | Bowman     |  | RN NP               | University of Rochester School of Medicine and Dentistry         | Rochester, NY USA | Research Nurse        |
| Ann Marie  | Scorsone   |  | MS CCRC             | University of Rochester School of Medicine and Dentistry         | Rochester, NY USA | Research Coordinator  |
| Caitlin    | Fallone    |  | MA                  | University of Rochester School of Medicine and Dentistry         | Rochester, NY USA | Research Coordinator  |
| Kyle       | Binion     |  | BS                  | University of Rochester School of Medicine and Dentistry         | Rochester, NY USA | Research Coordinator  |
| Constance  | Orme       |  |                     | University of Rochester School of Medicine and Dentistry         | Rochester, NY USA | Research Coordinator  |
| Premini    | Sabaratnam |  | MPH                 | University of Rochester School of Medicine and Dentistry         | Rochester, NY USA | Follow-up Examiner    |
| Alison     | Kent       |  | BMBS<br>FRACP<br>MD | University of Rochester School of Medicine and Dentistry         | Rochester, NY USA | Follow-up Examiner    |
| Rachel     | Jones      |  |                     | University of Rochester School of Medicine and Dentistry         | Rochester, NY USA | Research Coordinator  |
| Elizabeth  | Boylin     |  | BA                  | University of Rochester School of Medicine and Dentistry         | Rochester, NY USA | Research Coordinator  |
| Daisy      | Roches     |  | BS MHA              | University of Rochester School of Medicine and Dentistry         | Rochester, NY USA | Research Nurse        |
| Emily      | Lillie     |  | BA                  |                                                                  |                   |                       |

Supplemental Online Content: Nonauthor Collaborators

\*First name, last name, and suffix (if applicable) are required and will appear in PubMed.

|            |                  |  |                     |                                                                  |                   |                                  |
|------------|------------------|--|---------------------|------------------------------------------------------------------|-------------------|----------------------------------|
| Jennifer   | Kachelmeyer      |  | BS                  | University of Rochester School of Medicine and Dentistry         | Rochester, NY USA | Research Coordinator             |
| Kimberly G | McKee            |  | BS                  | University of Rochester School of Medicine and Dentistry         | Rochester, NY USA | Research Coordinator             |
| Kelly R    | Coleman          |  | PsyD                | University of Rochester School of Medicine and Dentistry         | Rochester, NY USA | Follow-up Examiner               |
| Karen      | Wynn             |  |                     | Roch/Buff?                                                       |                   |                                  |
| Michelle   | Hartley-McAndrew |  | MD                  | University of Buffalo Women's and Children's Hospital of Buffalo | Buffalo, NY USA   | Follow-Up Principal Investigator |
| Nirupama   | Laroia           |  | MD                  | University of Rochester School of                                | Rochester, NY USA |                                  |
| Jeffrey    | Meyers           |  | MD                  | University of Rochester School of                                | Rochester, NY USA |                                  |
| Luc P      | Brion            |  | MD                  | University of Texas Southwestern Medical Center                  | Dallas, TX USA    | Principal Investigator           |
| Diana M    | Vasil            |  | MSN BSN RNC-NIC     | University of Texas Southwestern Medical Center                  | Dallas, TX USA    | Research Coordinator             |
| Sally S    | Adams            |  | MS RN CPNP          | University of Texas Southwestern Medical Center                  | Dallas, TX USA    | Follow-up Examiner               |
| Lijun      | Chen             |  | RN PhD              |                                                                  |                   |                                  |
| Maria M    | De Leon          |  | RN BSN              | University of Texas Southwestern Medical Center                  | Dallas, TX USA    | Research Nurse                   |
| Frances    | Eubanks          |  | RN BSN              | University of Texas Southwestern Medical Center                  | Dallas, TX USA    | Research Nurse                   |
| Rebecca    | McDougald        |  | MSN APRN CPNP-PC/AC | University of Texas Southwestern Medical Center                  | Dallas, TX USA    | Research Nurse                   |
| Lara       | Pavageau         |  | MD                  | University of Texas Southwestern Medical Center                  | Dallas, TX USA    | Site Investigator                |
| Pollianna  | Sepulveda        |  | RN                  | University of Texas Southwestern Medical Center                  | Dallas, TX USA    | Research Nurse                   |
| Alicia     | Guzman           |  |                     | University of Texas Southwestern Medical Center                  | Dallas, TX USA    | Research Coordinator             |
| Elizabeth  | Heyne            |  | PsyD PA-C           | University of Texas Southwestern Medical Center                  | Dallas, TX USA    | Follow-up Examiner               |
| Linda A    | Madden           |  | BSN RN CPNP         |                                                                  |                   |                                  |
| Lizette E  | Lee              |  | RN                  | University of Texas Southwestern Medical Center                  | Dallas, TX USA    | Research Nurse                   |
| Kristine   | Tolentino-Plata  |  | MS                  |                                                                  |                   |                                  |
| Cathy      | Twel Boatman     |  | MS CIMI             | University of Texas Southwestern Medical Center                  | Dallas, TX USA    | Follow-up Examiner               |

Supplemental Online Content: Nonauthor Collaborators

\*First name, last name, and suffix (if applicable) are required and will appear in PubMed.

|             |             |  |                           |                                                       |                   |                                  |
|-------------|-------------|--|---------------------------|-------------------------------------------------------|-------------------|----------------------------------|
| Azucena     | Vera        |  | AS                        | University of Texas Southwestern Medical Center       | Dallas, TX USA    | Research Coordinator             |
| Jillian     | Waterbury   |  | DNP RN<br>CPNP-PC         | University of Texas Southwestern Medical Center       | Dallas, TX USA    | Research Nurse                   |
| Amy         | Atok        |  | MS RD<br>CSP LD           |                                                       |                   |                                  |
| Denise      | Weuhausen   |  | RD LD<br>MPH              |                                                       |                   |                                  |
| Elizabeth   | Brammer     |  | MMSc RD<br>CSP LD<br>CNSC |                                                       |                   |                                  |
| Cheryl      | Laird       |  | RD LD<br>CNSC             |                                                       |                   |                                  |
| Seetha      | Shankaran   |  | MD                        | Wayne State University                                | Detroit, MI USA   | Principal Investigator           |
| Athina      | Pappas      |  | MD                        | Wayne State University                                | Detroit, MI USA   | Follow-Up Principal Investigator |
| Beena G     | Sood        |  | MD MS                     | Wayne State University                                | Detroit, MI USA   | Principal Investigator           |
| Melissa     | February    |  | MD                        | Wayne State University                                | Detroit, MI USA   | Research Nurse                   |
| Prashant    | Agarwal     |  | MD                        | Wayne State University                                | Detroit, MI USA   | Site Investigator                |
| Sanjay      | Chawla      |  | MD                        | Wayne State University                                | Detroit, MI USA   | Principal Investigator           |
| Rebecca     | Bara        |  | RN BSN                    | Wayne State University                                | Detroit, MI USA   | Research Coordinator             |
| Kirsten     | Childs      |  | RN BSN                    | Wayne State University                                | Detroit, MI USA   | Research Nurse                   |
| Eunice      | Woldt       |  | RN MSN                    | Wayne State University                                | Detroit, MI USA   | Research Nurse                   |
| Laura       | Goldston    |  | MA                        | Wayne State University                                | Detroit, MI USA   | Follow-up Examiner               |
| Stephanie A | Wiggins     |  | MS                        | University of Michigan, C.S. Mott Children's Hospital | Ann Arbor, MI USA | Research Coordinator             |
| Mary K      | Christensen |  | BA RRT                    | University of Michigan, C.S. Mott Children's Hospital | Ann Arbor, MI USA | Research Coordinator             |
| Diane F     | White       |  | RRT<br>CCRP               | University of Michigan, C.S. Mott Children's Hospital | Ann Arbor, MI USA | Follow-up Examiner               |
|             |             |  |                           |                                                       |                   |                                  |
|             |             |  |                           |                                                       |                   |                                  |
