# Supplementary material
Source: PubMed Central journal article supplement (PMC10828950)
Supplement: jama-e2327693-s004.pdf [file jama-e2327693-s004.pdf]

## Data Sharing Statement

Colaizy. Neurodevelopmental Outcomes of Extremely Preterm Infants Fed Donor Milk or Preterm Infant Formula. *JAMA*. Published January 30, 2024. doi:10.1001/jama.2023.27693

### Data

**Data available:** Yes

**Data types:** Deidentified participant data, Data dictionary

**How to access data:** NICHD DASH <https://dash.nichd.nih.gov/>

**When available:** With publication

### Supporting Documents

**Document types:** None

### Additional Information

**Who can access the data:** Anyone requesting the data

**Types of analyses:** all analyses, no limitations

**Mechanisms of data availability:** Via NICHD DASH request

**Any additional restrictions:** unrestricted use
